# Supplementary material for: Prognostic value of left ventricular structure and strain in chronic kidney disease patients by cardiovascular magnetic resonance imaging: a retrospective study
Source: PeerJ journal article supplement (doi:10.7717/peerj.17853), 2024-08-02
Supplement: CKD_with_CMRFT.xlsx [file CKD_with_CMRFT.xlsx]

## Sheet: Sheet1
sex	age（y）	end point yes（1）/no（0）	follow-up time（months）	hypertension：yes（1）/no（0）	diabetes：yes（1）/no（0）	smoke： yes（1）/no（0）	eGFR CKD-EPI ml/min/1.73 m2	CR umol/L	UA umol/L	BUN mmol/L	Cys-C mg/L	Ca mmol/L	P mmol/L	TG mmol/L	CHOL mmol/L	HDL mmol/L	LDL mmol/L	HGB g/L	ALB g/L	HR（bpm）	Height（cm）	Weight（kg）	BSA （m2）	LVEDD(mm)	LVESD(mm)	LAD	RVEDD(mm)	RVESD(mm)	RAD	LV FS（%）	LVEDV （ml）	LVESV （ml）	LVSV（ml）	LVEF (%)	CO （l/min）	CI l/min/m2	LVM (ED,g)	LVMI (g/m2)	LVEDV/BSA (ml/m2）	RVEDV （ml）	RVESV （ml）	RVSV（ml）	RVEF (%)	LV-GCS（%）	LV-GRS（%）	LV-GLS（%）
M	58	1	11	1	1	0	18.8	311.1	546.3	19.7	3.05	2.08	1.31	1.46	4.45	1.21	2.05	92	32.3	66	159	68	1.7	63	52	45	46	36	60	17.46	325.85	237.18	88.67	27.21	5.85	3.44	209.89	123.46	191.34	276.58	232.12	44.45	16.07	-7.4	9.1	-5
F	68	1	0	1	1	0	6.05	475.1	215.3	5.63	0.82	2.21	1.37	1.17	3.75	1.09	1.76	134	35.1	83	145	38	1.24	44	39	38	28	23	40	11.36	117.49	91.32	26.16	22.27	2.17	1.75	88.26	71.18	94.45	102.43	62.92	39.51	38.58	-8.2	10.3	-7.1
M	48	0	29	0	1	0	4.69	945.4	424.8	17.64	5.29	1.77	1.99	0.8	2.29	0.99	0.83	99	29.7	78	158	49	1.47	54	48	52	33	26	68	11.1	190.71	146.92	43.79	22.96	3.42	2.32	146	99.32	129.31	210.03	186.81	23.22	11.06	-8.5	10.5	-7.6
M	71	1	0	1	0	0	7.18	695.9	276.4	12.91	5.17	2.28	1.45	1.33	4.1	0.97	2.12	82	34	68	165	65	1.72	73	56	56	35	32	65	23.29	420.47	310.83	109.63	26.07	7.45	4.34	246.97	143.59	245.02	139.75	110.97	28.78	20.59	-9.8	12.7	-8
F	83	1	11	0	0	0	3.69	784	446.6	25.77	6.51	1.83	1.13	0.67	4.14	1.61	1.79	69	30.5	112	150	50	1.43	47	37	38	22	17	35	21.27	141.64	98.5	43.13	30.45	4.83	3.37	101.57	71.03	98.87	85.91	48.6	37.31	43.43	-11.1	14.8	-8.1
M	72	1	5	1	1	0	8.19	623.8	482.4	14.27	3.47	2.04	1.57	1.28	4.73	1.24	2.3	87	27.8	66	170	63	1.73	53	45	39	23	15	45	15.09	202.89	158.57	44.32	21.85	2.93	1.69	163.22	94.35	117.25	131.1	81.92	49.18	37.51	-8.5	10.6	-8.1
M	56	1	24	1	0	0	3.33	1396.3	444.7	20.04	6.99	1.8	2.56	0.69	6.38	1.62	3.28	87	25.9	79	170	60	1.69	62	50	33	23	18	51	19.4	269.04	199.19	69.86	25.97	5.52	3.26	194.68	115.2	158.73	137.35	72.65	64.7	47.1	-8.7	10.8	-8.3
F	54	0	28	0	0	0	2.77	1373.3	554.7	14.74	8.15	2.38	2.02	4.29	4.8	1.07	1.9	132	38.2	94	166	77	1.85	53	40	32	25	13	34	24.53	162.45	113.64	48.81	30.05	4.59	2.48	96.56	52.19	87.7	92.9	58.25	34.66	37.3	-11.4	16.4	-8.4
M	56	1	25	1	1	0	8.71	592.4	643.2	20.74	5.11	2.13	1.32	2.29	3.84	0.97	1.69	72	30	86	165	59	1.65	54	42	35	25	22	33	22.22	195.73	126.82	68.91	35.21	5.93	3.6	139.53	84.56	118.85	122.62	50.01	72.61	59.22	-9.8	12.7	-9.1
F	34	0	27	1	0	0	5.54	720.1	579.3	21.38	5.43	2.14	1.76	2.73	6.47	1.31	3.16	73	34.5	98	157	60	1.6	54	47	34	38	24	38	12.96	210.15	149.54	60.61	28.84	5.94	3.71	174.86	109.29	131.35	138.04	68.5	69.54	50.38	-11.6	15.9	-9.1
F	59	1	27	1	1	0	3.77	854	492.2	23.33	6.11	1.92	2.41	1.01	3.87	1.52	1.56	103	32.8	82	150	54	1.48	51	43	42	38	34	61	15.68	186.33	126.99	59.34	31.85	4.87	3.29	181.38	122.55	125.89	252.93	204.24	48.68	19.25	-10.4	13.7	-9.1
M	38	0	24	1	0	0	4.41	1265.3	685.1	31.12	5.34	1.54	3.22	1.96	3.99	0.64	2	65	35.6	81	170	74	1.85	69	56	40	33	23	45	18.84	327.72	211.65	116.07	35.42	9.4	5.09	187.56	101.38	177.38	189.2	123.6	65.6	34.67	-10.6	14.2	-9.6
M	48	1	0	1	1	1	13.02	374.8	161.1	22.89	4.17	1.94	1.62	2.93	3.42	0.7	1.09	67	25.4	93	150	48	1.41	52	45	32	30	25	45	13.46	156.39	110.1	45.3	28.96	4.21	2.98	95.67	67.85	110.6	126.71	94.16	32.56	25.69	-10.7	14.2	-10.1
M	33	0	30	1	0	0	7.24	791.6	325.4	23.69	5.09	1.92	2.29	1.24	4.59	0.95	2.64	53	35	110	167	64	1.67	47	29	27	31	22	40	38.29	104.61	62.87	41.74	39.9	4.59	2.74	108.75	65.12	62.54	90.73	45.54	45.19	49.81	-12.7	18.4	-10.1
M	55	1	9	1	0	0	5.84	823	471.6	18.8	6.56	2.08	2.13	1.86	4.06	0.93	2.05	81	33.3	87	170	53	1.61	64	56	42	23	19	58	12.5	284.45	193.35	91.1	32.03	7.93	4.93	190.55	118.35	176.91	188.73	138.28	50.46	26.73	-9.8	12.5	-10.4
M	75	1	26	1	0	1	0.68	4775	377.4	15.85	4.02	1.44	3.63	1.13	2.49	0.95	0.86	78	23.2	62	165	48	1.51	52	40	32	31	19	40	23.08	163.86	90.61	73.24	44.7	4.54	3.01	134.45	89.04	108.62	130.04	55.04	75	57.68	-12	16.7	-10.9
M	45	0	28	1	1	1	22.7	278	406.7	12.68	2.27	2.09	1.34	1.77	7.6	2.23	3.37	109	32.7	71	168	63	1.72	51	38	39	31	24	36	25.49	193.87	128.98	64.89	33.47	4.61	2.69	167.5	97.38	113	142.57	69.84	72.73	51.01	-10.7	13.9	-11
M	28	0	26	1	0	1	2.84	1754.3	547.6	33.26	4.92	1.65	2.34	1.37	4.14	1	2.08	70	34.4	84	168	56	1.63	61	47	33	19	11	42	22.95	194.54	126.34	68.2	35.06	5.73	3.51	141.27	86.67	119.21	124.18	60.48	63.7	51.3	-9.3	11.8	-11.1
M	54	0	30	1	0	0	17.33	376.2	282.9	19.43	4.14	2.03	1.61	0.55	3.54	1.09	1.87	66	34.4	71	178	75	1.93	60	45	45	32	24	41	25	236.26	162.85	73.42	31.07	5.21	2.71	145.34	75.31	122.62	127.09	68.75	58.34	45.91	-13.4	19.2	-11.2
M	57	1	25	1	1	0	6.46	799.5	341.7	15.55	5.93	2.19	1.73	1.36	5.97	1.84	2.68	147	38.6	70	172	62	1.73	54	37	38	26	12	40	31.48	187.52	101.44	86.08	45.9	6.03	3.48	162.44	93.9	108.18	119.3	43.01	76.28	63.94	-13.4	19.4	-11.3
M	71	0	28	1	0	0	4.22	1050.2	527.7	29.96	5.08	1.44	2	0.7	3.7	1.3	1.7	75	40.3	72	160	60	1.62	60	51	41	23	16	45	15	195.07	133.02	62.05	31.81	4.47	2.75	140.62	86.8	120.26	144	82.2	61.8	42.92	-11.6	15.7	-11.7
F	20	0	29	1	1	0	6.83	602.4	325.3	18.1	3.89	2.16	1.92	1.75	5.23	0.82	3.17	60.07	33.6	112	151	50	1.44	53	38	38	30	19	45	28.3	167.47	89.9	77.57	46.32	8.69	6.04	111.76	77.61	116.35	83.07	13.4	69.67	83.87	-13.5	19.5	-11.7
M	61	0	30	1	0	0	5.01	1009.2	564	29.34	5.38	2.13	2.19	1.47	4.29	1.12	2.17	90	41	91	164	72	1.78	45	30	30	32	22	31	33.33	136.08	76.09	59.99	44.08	5.46	3.06	121.52	68.27	76.26	96.16	39.07	57.08	59.36	-12.7	18.5	-12.1
M	56	0	26	1	1	0	0.76	5208.7	569.7	35.19	9.12	0.72	1.52	1.92	5.04	1	2.4	105	35.7	82	167	68	1.76	60	42	28	30	22	47	30	192.48	95.71	96.76	50.27	7.93	4.5	180.02	102.28	109.08	139.43	65.81	73.61	52.8	-13.7	19.8	-12.1
M	50	0	25	1	1	0	3.09	1515	491.4	23.35	8.96	2.32	2.76	1.53	5.23	1.09	2.62	105	31.3	96	160	66	1.69	39	21	30	23	11	41	46.15	95.05	41.75	53.3	56.08	5.12	3.03	105.27	62.29	56.27	61.34	40.08	21.25	34.65	-14.2	20.6	-12.6
F	77	1	25	1	0	0	7.16	489.5	303.7	14.45	3.27	1.69	1.73	2.7	4.78	0.73	2.45	67	39	69	160	55	1.56	70	53	53	26	18	50	24.29	254.56	157.5	97.06	38.13	6.7	4.28	157.09	100.7	162.85	109.96	59.23	50.73	46.13	-11.8	16.1	-12.7
M	69	1	24	0	0	0	4.9	910.7	519.3	14.97	3.85	2.16	1.19	0.81	4.47	1.55	2.12	75	33	89	167	53	1.59	52	38	31	25	16	38	26.92	148.83	79.93	68.9	46.29	6.13	3.86	82.11	51.64	93.76	116.45	56.33	60.12	51.62	-14.9	22	-12.9
F	39	0	28	1	0	0	10.8	378.5	288.1	20.04	3.11	2.46	1.26	7.63	5.23	1.64	1.47	117	34.9	92	150	58	1.53	41	32	29	27	15	52	21.95	93.19	50.81	42.37	45.47	3.9	2.56	75.96	49.65	61.08	61.28	32.36	28.93	47.2	-11.3	15.3	-12.9
F	42	0	30	1	0	0	2.86	1108.3	487.7	21.69	6.13	2.3	2.72	5.12	6.85	1.19	3.23	91	41.9	78	148	50	1.42	42	21	23	25	18	41	50	78.85	28.92	49.93	63.32	3.89	2.75	81.5	57.39	55.58	66.35	34.59	31.76	47.86	-20.9	38.5	-13
M	63	1	5	1	1	0	6.12	745.5	383.5	11.21	6.52	2.36	1.67	0.98	5.1	1.79	2.45	83	31.9	94	163	52	1.55	51	33	45	22	20	50	35.29	196.4	106.32	90.09	45.87	8.47	5.47	142.33	91.83	126.95	175.58	117.32	58.26	33.18	-16.1	24.7	-13
F	56	1	5	1	1	0	3.59	892.3	476.4	29.78	3.95	1.86	2.53	2.69	7.22	1.02	4.05	67	27	98	155	50	1.47	49	32	39	28	18	45	34.69	156.85	73.23	83.62	53.31	8.19	5.59	114.81	78.1	106.92	131.76	60.81	70.95	53.85	-15.9	24.2	-13
M	53	0	23	1	0	0	3.29	1521.1	400.1	30.22	6.27	1.75	2.84	0.95	3.29	1.02	1.58	66	36.7	78	172	70	1.83	57	36	38	28	19	52	36.84	205.18	92.85	112.33	54.75	8.76	4.8	185.36	101.29	112.42	168.5	73.37	95.13	56.46	-17.3	27.7	-13.1
M	57	0	29	1	1	1	11.11	484.6	159.8	19.52	4.57	1.79	0.48	1.6	3.42	0.7	1.72	74	26.7	83	167	60	1.67	50	32	32	30	27	40	36	137.95	82.12	55.83	40.47	4.63	2.77	136.24	81.58	82.45	136.57	85.78	50.79	37.19	-14.6	21.3	-13.4
F	52	1	1	1	0	0	3.55	1117.8	600.8	24.47	5.73	2.5	2.38	5.21	4.82	1.08	1.75	119	39.4	82	157	85	1.88	41	21	38	32	25	42	48.78	111.03	39.82	71.22	64.14	5.84	3.15	86.53	46.03	59.94	80.93	41.28	39.65	49	-19.7	34.3	-13.5
M	60	1	10	1	0	0	0.62	5301	231.8	85.5	5.2	0.84	2.09	2.78	7.63	1.63	3.48	93	36.6	69	160	50	1.5	60	43	33	32	24	51	28.33	209.11	115.21	93.9	44.91	6.48	4.32	144.85	96.57	139.3	181.63	83.32	98.31	54.13	-13.9	20.5	-13.7
F	43	0	30	1	0	0	3.41	1150.4	633.5	33.06	5.07	1.89	3.17	0.77	3.77	1.27	1.78	83	43.5	84	165	70	1.77	62	45	42	28	21	41	27.42	209.91	109.23	100.68	47.96	8.46	4.78	151.54	85.62	118.53	164.02	71.69	92.33	56.29	-15.1	22.3	-13.8
F	37	0	29	0	0	0	2.27	1355.4	729	41.8	3.9	1.66	2.61	0.9	3.96	1.14	1.96	92	28.6	68	156	43	1.38	52	44	32	21	16	41	15.38	142.55	91.1	51.45	36.09	3.5	2.53	92.23	66.83	103.12	123.61	64.47	59.14	47.4	-12.4	17.1	-13.8
M	58	1	4	1	1	0	4.04	1130.5	582.8	28.08	3.68	2.06	2.91	0.81	2.4	1.06	0.88	98	37	68	178	50	1.57	43	28	25	27	16	40	30.23	113.48	53.66	59.82	52.71	4.07	2.51	100.39	63.94	33.09	112.36	39.58	72.78	64.78	-17	26.6	-14
F	51	0	25	0	0	0	3.52	854.1	396.4	12.01	8.74	2.75	2.3	3.39	8.28	1.04	4.31	121	37.7	89	150	43	1.34	41	26	28	29	18	36	36.59	86.93	34.94	52	59.81	4.63	3.44	67.52	50.39	64.7	83.33	33.98	49.35	59.22	-17.1	27.4	-14.1
F	61	1	10	1	1	0	3.06	979.9	475.6	19.6	3.49	2.39	1.8	1.07	4.34	2.06	1.44	78	39	97	150	49	1.42	43	24	33	29	15	39	44.19	91.11	35.98	55.13	60.51	5.35	3.77	88.24	62.14	64.15	77.43	37.96	39.47	50.97	-19.8	34.2	-14.6
M	42	0	27	1	0	0	13.04	477.9	91.3	7.36	3.83	1.75	1.2	1.57	3.72	0.76	1.88	62	36.1	85	168	72	1.82	50	25	28	24	12	42	50	151.93	63.03	88.9	58.51	7.56	4.16	162.45	89.26	83.67	142.52	57.51	85.01	59.65	-15.9	24.9	-14.7
M	65	1	25	1	1	1	10.39	522.8	403.4	11.18	3.39	2.05	1.33	1.67	4.83	0.78	2.7	69	21.9	85	170	65	1.75	47	28	37	29	13	49	40.43	133.16	53.88	79.28	59.54	6.74	3.84	107.67	61.53	75.93	118.85	51.91	66.94	56.32	-18.2	29.6	-14.7
F	56	1	1	1	1	0	8.53	445.7	201.5	7.06	4.16	2.09	0.93	2.27	7	1.53	3.56	65	20.2	92	157	57	1.57	49	32	39	32	21	33	34.69	133.3	71.91	61.39	46.05	5.65	3.61	94.58	60.24	85.15	110.75	55.51	55.24	49.88	-13.6	19.6	-14.8
M	68	1	11	1	0	0	5.22	1089.6	431.5	17.41	4.8	2.13	1.28	1.46	3.97	0.82	1.98	108	36.4	76	174	93	2.08	49	32	31	34	28	40	34.69	181.52	89.49	92.02	50.7	6.99	3.37	169.29	81.39	104.32	215.16	130.79	84.37	39.21	-16.8	26.4	-14.9
F	50	0	27	1	0	0	2.92	1015.4	399.8	15.22	8.19	2.69	2.16	1.18	5.73	1.52	2.87	143	35.6	70	146	46	1.36	51	34	33	35	28	30	33.33	144.48	69.74	74.74	51.73	5.23	3.86	109.38	80.43	106.57	117.42	49.76	67.66	57.62	-16.8	26.5	-15
M	72	1	8	1	1	0	0.57	5322.7	1067.5	136.04	3.85	0.37	1.52	1.12	4.26	1.42	1.87	65	36.6	106	153	49	1.44	42	24	26	27	15	33	42.86	78.73	33.2	45.53	57.83	4.83	3.35	81.59	56.66	54.64	81.59	28.63	52.96	64.91	-18.5	30.6	-15
F	50	1	21	1	1	0	5.59	657	496.6	19.86	4.07	1.69	1.94	1.57	5.24	1.15	2.66	72	26.8	78	156	58	1.57	39	24	41	23	14	37	38.46	104.49	52.21	52.27	50.03	4.08	2.6	96.55	61.5	66.56	95.9	39.09	56.81	59.24	-18.3	29.9	-15
F	51	0	27	1	0	0	3.89	848.4	539.6	30.01	5.14	2.01	2.05	1.9	5.47	0.86	1.55	101	46.7	80	156	50	1.47	41	26	27	32	19	40	36.59	90.3	39.87	50.43	55.85	4.03	2.74	68.98	46.93	61.27	90.5	40.93	49.57	54.77	-17.7	28.7	-15.1
F	41	1	11	1	0	0	3.23	1065.5	427.8	27.81	8.1	1.81	2.66	1.36	7.17	2.12	3.03	113	26.8	74	163	50	1.52	52	38	37	33	23	42	26.92	148.59	78.62	69.97	47.09	5.18	3.4	99.41	65.4	97.66	128.22	57.62	70.61	55.06	-14.8	21.8	-15.1
F	69	0	28	1	1	0	2.42	1176.4	362.2	35.83	5.5	1.38	2.56	0.9	2.65	0.95	1.15	91	33.6	88	158	45	1.42	47	34	32	40	24	51	27.66	118.44	50.12	68.32	57.68	6.01	4.23	95.44	67.21	83.27	90.11	43.27	46.84	51.98	-20.1	35.2	-15.3
F	60	0	30	1	0	0	3.99	801.6	277.8	31.76	4.52	2.29	1.78	0.97	3.04	1.17	1.11	106	45.9	78	156	49	1.46	50	36	34	31	21	40	28	130.88	60.22	70.65	53.98	5.51	3.77	72.13	49.4	89.57	114.95	49.78	65.17	56.7	-17.1	27.1	-15.7
M	57	0	25	1	1	0	4.81	999.9	709.7	31.07	5.11	1.85	1.48	2.03	4.88	1	2.34	90	38.6	68	165	61	1.67	50	30	21	25	16	40	40	111.73	50.25	61.48	55.03	4.18	2.5	82.85	49.61	66.89	119.9	55.95	63.96	53.34	-18.4	30.9	-15.7
F	44	0	26	0	0	0	18.29	256.8	265.8	6.45	2.66	2.27	1.67	2.74	5.51	1.26	2.71	106	19.3	76	155	70	1.69	44	32	27	40	35	41	27.27	110.37	51.54	58.82	53.3	4.47	2.64	65.74	38.9	65.21	120.26	75.33	44.93	37.36	-17.6	28	-15.9
F	52	0	29	1	0	0	4.32	763.5	291.4	26.43	4.31	1.92	1.88	0.63	4.17	1.21	2.09	78	35.4	94	155	49	1.45	49	34	33	23	15	48	30.61	159.44	69.34	90.1	56.51	8.47	5.82	109.39	75.44	109.63	138.85	47.66	91.2	65.68	-18.3	30.2	-16
M	50	0	28	0	1	0	9.33	565.8	430.1	15.86	2.54	1.9	1.35	1.43	4.32	1.12	1.95	75	33.1	69	165	58	1.63	57	41	34	32	27	41	28.07	140.64	77.71	62.93	44.74	4.34	2.66	85.43	52.41	86.02	136.9	72.9	64	46.75	-17	26.4	-16
M	57	0	29	1	0	0	4.58	1169.9	397.8	17.54	5.12	2.12	2.08	1.29	3.72	0.88	1.95	148	35.1	82	173	77	1.91	53	28	32	35	24	35	47.17	132.84	41.61	91.23	68.68	7.48	3.92	112.78	59.05	69.6	118.36	52.66	65.69	55.5	-20.3	36.2	-16.2
M	68	1	17	1	1	0	14.89	386.1	512.1	10.15	3.32	1.81	1.45	1.09	3.39	0.99	1.92	84	22.7	95	170	68	1.79	50	32	44	29	15	47	36	156.58	67.18	89.4	57.1	8.49	4.75	134.05	74.89	87.59	152.46	56.92	95.54	62.67	-19.6	33.8	-16.2
M	55	0	30	1	1	0	6.2	767.7	615.7	39.15	4.68	2.27	1.89	1.45	5.78	1.3	3.11	101	39.4	67	160	56	1.58	52	38	35	31	18	37	26.92	171.06	94.65	76.41	44.67	5.12	3.25	128.39	81.26	108.6	154.85	70.84	84.02	54.26	-13.1	18.5	-16.5
F	45	0	30	1	0	0	3.32	1111.9	686.6	34.13	4.66	2.17	2.29	1.86	5.6	1.24	2.87	84	40.8	91	164	62	1.67	58	42	41	30	21	48	25	217.09	109.75	107.33	49.44	9.77	5.85	133.04	79.66	130.09	154.69	72.66	82.03	53.03	-16.8	26.4	-16.5
M	51	0	28	1	1	0	4.22	1114.3	800.4	30.23	6.52	1.93	2.61	1.53	7.01	1.57	3.75	68	40.5	73	160	60	1.62	47	32	40	21	16	53	31.91	126.09	63.62	62.47	49.54	4.56	2.81	107.83	66.56	77.73	119.5	53.64	65.86	55.11	-16.5	25.8	-16.5
M	59	1	6	1	1	0	10.91	522.9	301.2	22.4	3.48	1.91	1.62	1.28	3.89	0.71	2.11	86	31.5	63	168	71	1.81	60	36	46	35	23	50	40	239.37	106.56	132.81	55.48	8.37	4.64	145.27	80.26	132.61	217.88	124.78	93.1	42.73	-20	34.1	-17
M	80	0	29	1	0	0	5.27	847.1	549.1	39.2	4.59	2.1	1.71	1.69	4.92	1.64	2.11	79	32.3	77	168	55	1.62	49	31	37	27	22	49	36.73	153.6	66.22	87.38	56.89	6.73	4.15	95.21	58.77	94.85	144.14	63.36	80.78	56.04	-19.4	32.6	-17.4
M	29	0	25	1	0	0	3.73	1321.4	541.2	32.4	6.85	2.14	1.96	0.99	4.3	1.12	2.05	69	31.1	62	163	53	1.56	54	35	30	32	27	44	35.19	170.21	79.82	90.38	53.1	5.6	3.59	102.71	65.84	109.17	171.46	84.3	87.17	50.84	-17.3	28.9	-17.5
M	64	0	25	0	0	0	5.58	1063.2	368	12.41	9.18	2.9	1.35	1.91	5.33	1.57	2.23	86	29.8	86	160	114	2.13	46	23	28	34	28	35	50	137.17	64.41	72.77	53.05	6.26	2.94	91.84	43.12	64.38	133.03	73.14	59.89	45.02	-17.3	27.4	-17.6
F	55	0	26	0	0	0	5.35	617.1	249.8	14.58	3.65	1.87	3.78	1.4	2.91	1.02	1.16	67	46	56	147	51	1.42	55	38	37	34	23	45	30.91	124.32	69.3	55.02	44.26	3.08	2.16	62.23	43.82	87.33	104.28	48.57	55.71	53.42	-16.4	25.4	-18
F	52	1	26	1	1	0	4.36	816.5	313.5	30.14	7.95	1.9	0.86	2.09	4.49	1.12	2.74	101	33.9	97	155	60	1.59	52	30	41	30	14	39	42.3	164.73	70.08	94.65	57.46	9.18	5.79	117.13	73.67	103.92	152.53	47.05	105.47	69.15	-17.8	28.6	-18.3
F	30	0	28	1	0	0	5.08	834.8	413.5	35.49	4.49	2.68	1.89	1.4	2.44	0.82	1.01	114	50.7	65	158	68	1.69	51	31	36	32	26	42	39.22	171.59	70.05	101.55	59.18	6.6	3.91	99.21	58.7	101.54	175.67	64.09	111.58	63.52	-19.7	33.7	-18.3
M	83	1	7	1	0	0	8.07	587.4	322.7	11.21	3.9	1.77	0.92	1.09	5.21	1.32	2.7	79	21.6	63	162	60	1.64	54	26	39	29	17	42	51.85	172.08	67.23	104.85	60.93	6.61	4.04	124.02	75.62	105.14	139.06	55.89	83.17	59.81	-20.2	34.6	-18.3
F	67	1	24	1	0	0	4.57	725.2	183.1	13.93	6.5	2.18	1.85	1.3	3.75	1.22	1.65	112	43.1	104	158	53	1.52	48	26	35	32	20	46	45.83	126.23	48.36	77.86	61.68	8.1	5.31	106.45	70.03	82.78	116.78	49.4	67.38	57.7	-19.9	34.8	-18.4
M	49	1	21	0	0	0	9.4	585.4	614.6	23.75	3.38	1.42	2.01	0.86	3.01	1.26	1.21	65	37.1	65	170	61	1.71	56	35	38	32	23	47	37.5	194.24	84.56	109.68	56.47	7.13	4.18	136.6	79.88	113.8	189.95	87.95	102	53.7	-17.7	29	-18.5
M	50	0	30	1	1	0	7.83	755.7	339.6	19.86	4.5	2.1	1.95	3.78	4.34	0.87	1.57	110	32.9	58	178	74	1.92	54	37	37	36	20	42	31.48	215.69	105.22	110.48	51.22	6.41	3.34	125.37	65.3	112.59	196.36	71.69	124.67	63.49	-17.3	27.4	-19
F	40	0	28	1	0	0	4.03	761.4	528.8	18.55	4.61	1.85	2.71	1.05	5.05	1.72	2.01	64	37.8	93	149	39	1.28	47	22	27	21	13	45	53.19	111.26	34.64	76.62	68.87	7.13	5.56	95.79	74.84	86.74	113.81	33.23	80.58	70.8	-20.7	36.7	-19
F	48	0	29	1	0	0	5.73	551.5	33.6	12.69	3.92	1.51	2.1	0.72	4.06	1.48	1.82	58	26.9	78	150	40	1.29	51	29	36	34	27	49	43.14	150.99	52.55	98.44	65.2	7.68	5.89	91.47	70.91	40.33	175.7	77.55	98.14	55.86	-20.2	35.6	-19.1
F	50	0	30	0	0	0	3.03	1172.7	719.5	25.84	5.7	2.14	3.39	2.26	5.06	1.03	2.65	116	38.9	71	155	67	1.66	48	28	35	35	23	26	39.13	93.13	31.35	61.78	66.33	4.39	2.64	61.58	37.1	56.06	95.74	40.13	55.61	58.09	-20.9	37.6	-19.4
F	23	0	25	1	0	0	0.64	4391.8	925.6	130.66	5.47	2.56	1.36	2.06	6.47	2.45	2.34	88	46.5	77	160	41	1.38	52	35	30	31	17	47	32.69	114.56	58.81	55.75	48.66	4.29	3.11	67.85	49.17	83.03	111.66	60.06	51.61	46.22	-19.1	31.8	-19.4
F	80	1	14	1	1	0	11.18	324.1	612	18.81	4.36	2.74	1.43	1.16	6.7	2.21	3.04	106	35.1	75	155	55	1.53	45	24	39	30	22	43	46.67	98.83	30.66	68.18	68.98	5.11	3.35	69.4	45.36	64.7	109.47	56.03	53.44	48.82	-21.5	39.9	-19.4
F	62	0	25	1	0	0	13.48	319.9	465.2	5.94	7.95	2.96	2.7	2	3.52	0.96	1.54	122	39.8	62	163	67	1.72	52	25	42	40	32	41	51.92	151.32	58.47	92.85	61.36	5.76	3.34	100.43	58.39	87.82	139.58	54.75	84.73	60.77	-20	35.5	-20.1
													11
													0
													29
													0
													11
													5
													24
													28
													25
													27
													27
													24
													0
													30
													9
													26
													28
													26
													30
													25
													28
													29
													30
													26
													25
													25
													24
													28
													30
													5
													5
													23
													29
													1
													10
													30
													29
													4
													25
													10
													27
													25
													1
													11
													27
													8
													21
													27
													11
													28
													30
													25
													26
													29
													28
													29
													17
													30
													30
													28
													6
													29
													25
													25
													26
													26
													28
													7
													24
													21
													30
													28
													29
													30
													25
													14
													25
